# Supplementary material for: Integrated Proteomic and Metabolomic Analyses Show Differential Effects of Glucose Availability in Marine Synechococcus and Prochlorococcus
Source: Microbiol Spectr. 2023 Feb 1;11(2):e03275-22. doi: 10.1128/spectrum.03275-22 (PMC10100731; doi:10.1128/spectrum.03275-22)
Supplement: Supplemental file 5 — Fig. S1 to S3 and legends for Tables S1 to S4. Download spectrum.03275-22-s0005.pdf, PDF file, 3.0 MB [file spectrum.03275-22-s0005.pdf]

## A. *Synechococcus* sp. WH7803

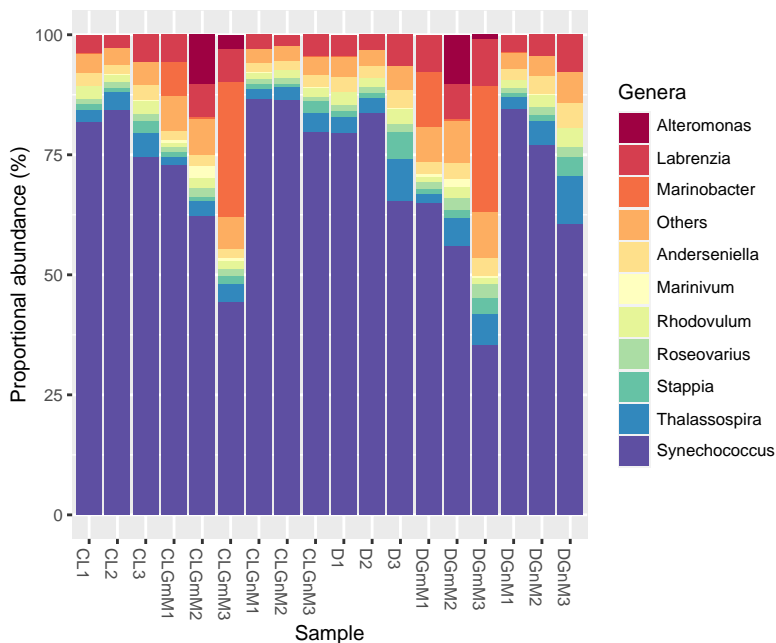

## B. *Synechococcus* sp. BL107

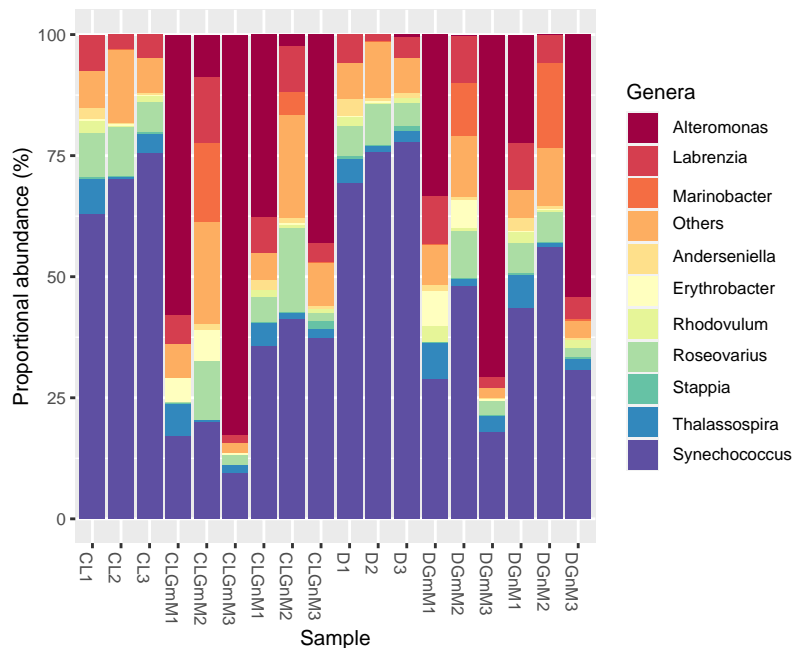

## C. *Prochlorococcus* sp. MED4

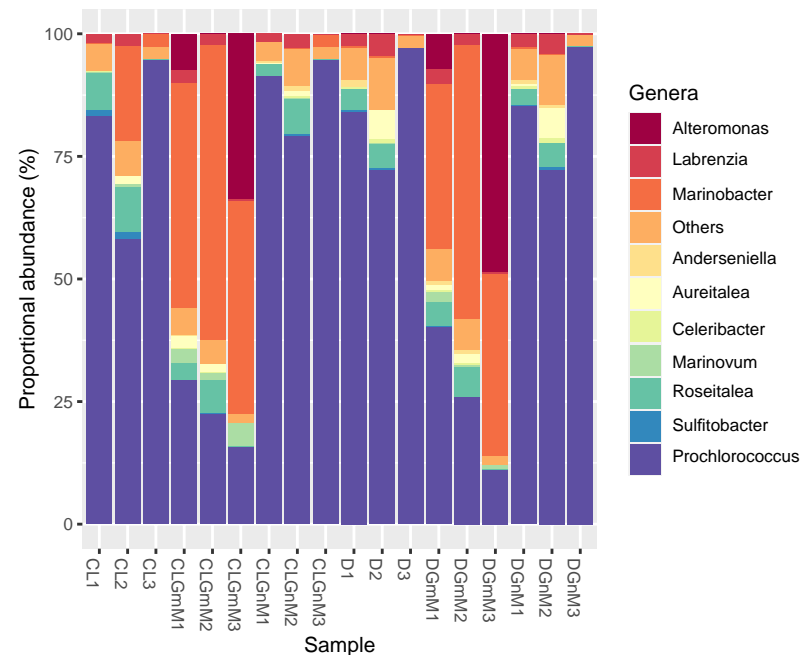

Supplementary Figure 1: Proportional abundance of different genera in cultures from *Synechococcus* and *Prochlorococcus*. Panel A shows results from *Synechococcus* sp WH7803 cultures. Panel B shows the results from *Synechococcus* sp BL107 cultures. Panel C shows the results from *Prochlorococcus* sp MED4 cultures. Proportional abundance was calculated based on total protein intensity per genera obtained by relative label-free abundance using Peaks X (Bioinformatics sol.) divided by total protein intensity per sample. Each column represent a sample. CL=control light, D=Darkess, GmM= glucose addition 5 mM, GnM= glucose addition 100 nM. Three biological replicates were prepared per condition (1,2,3).

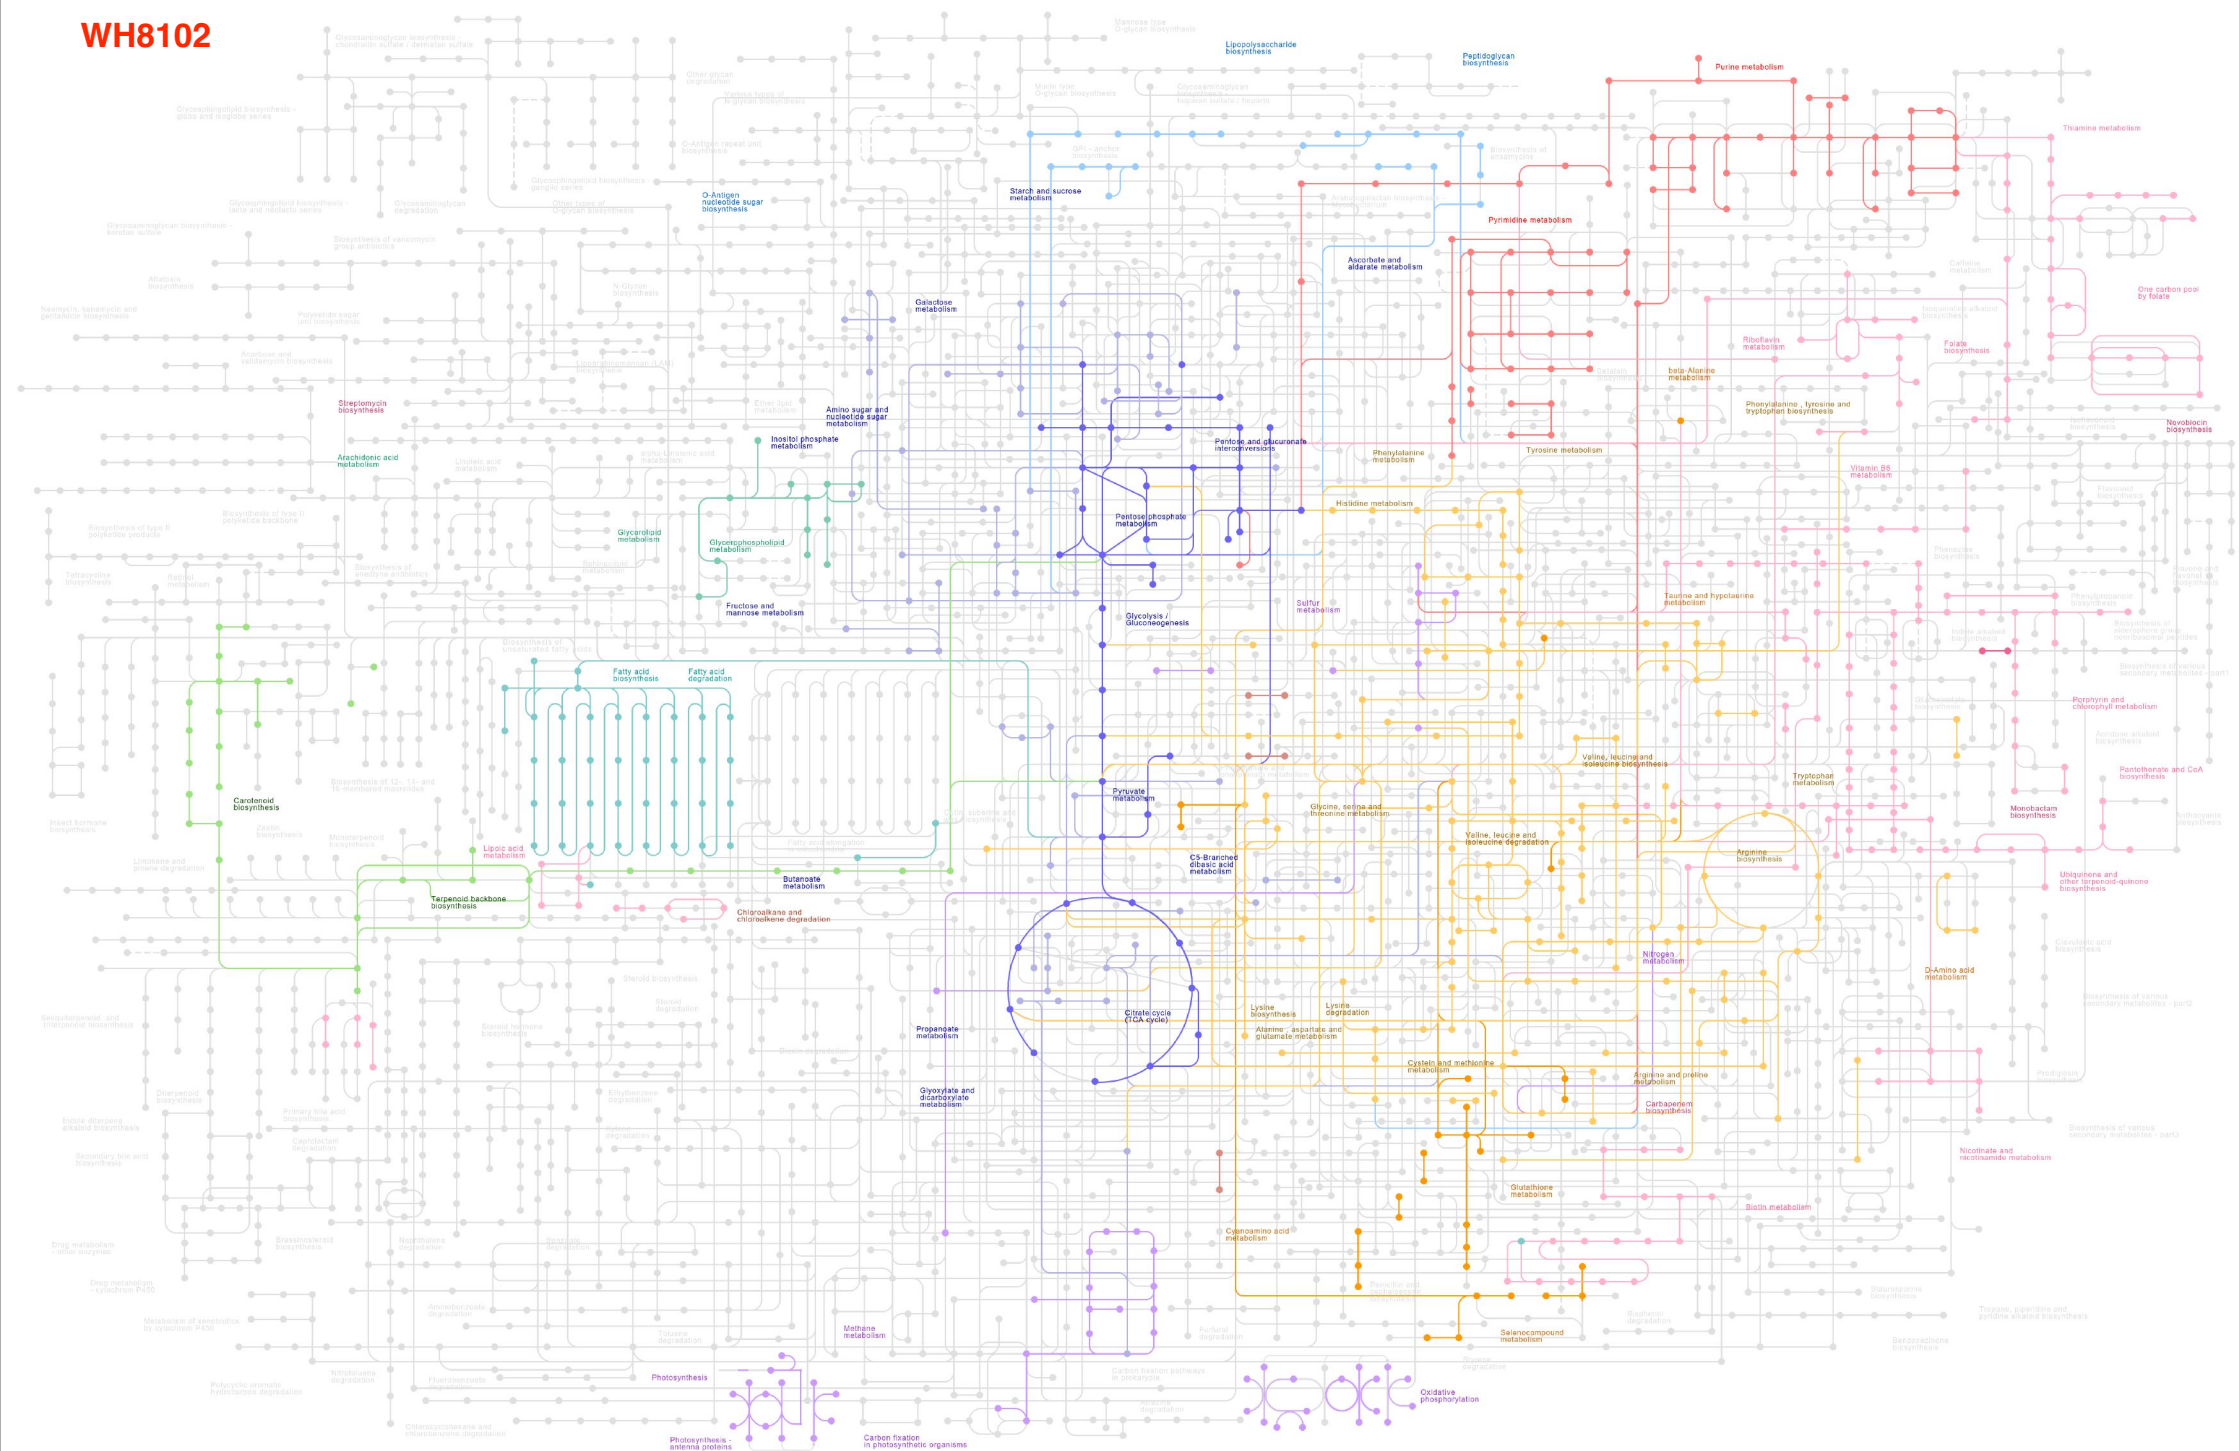

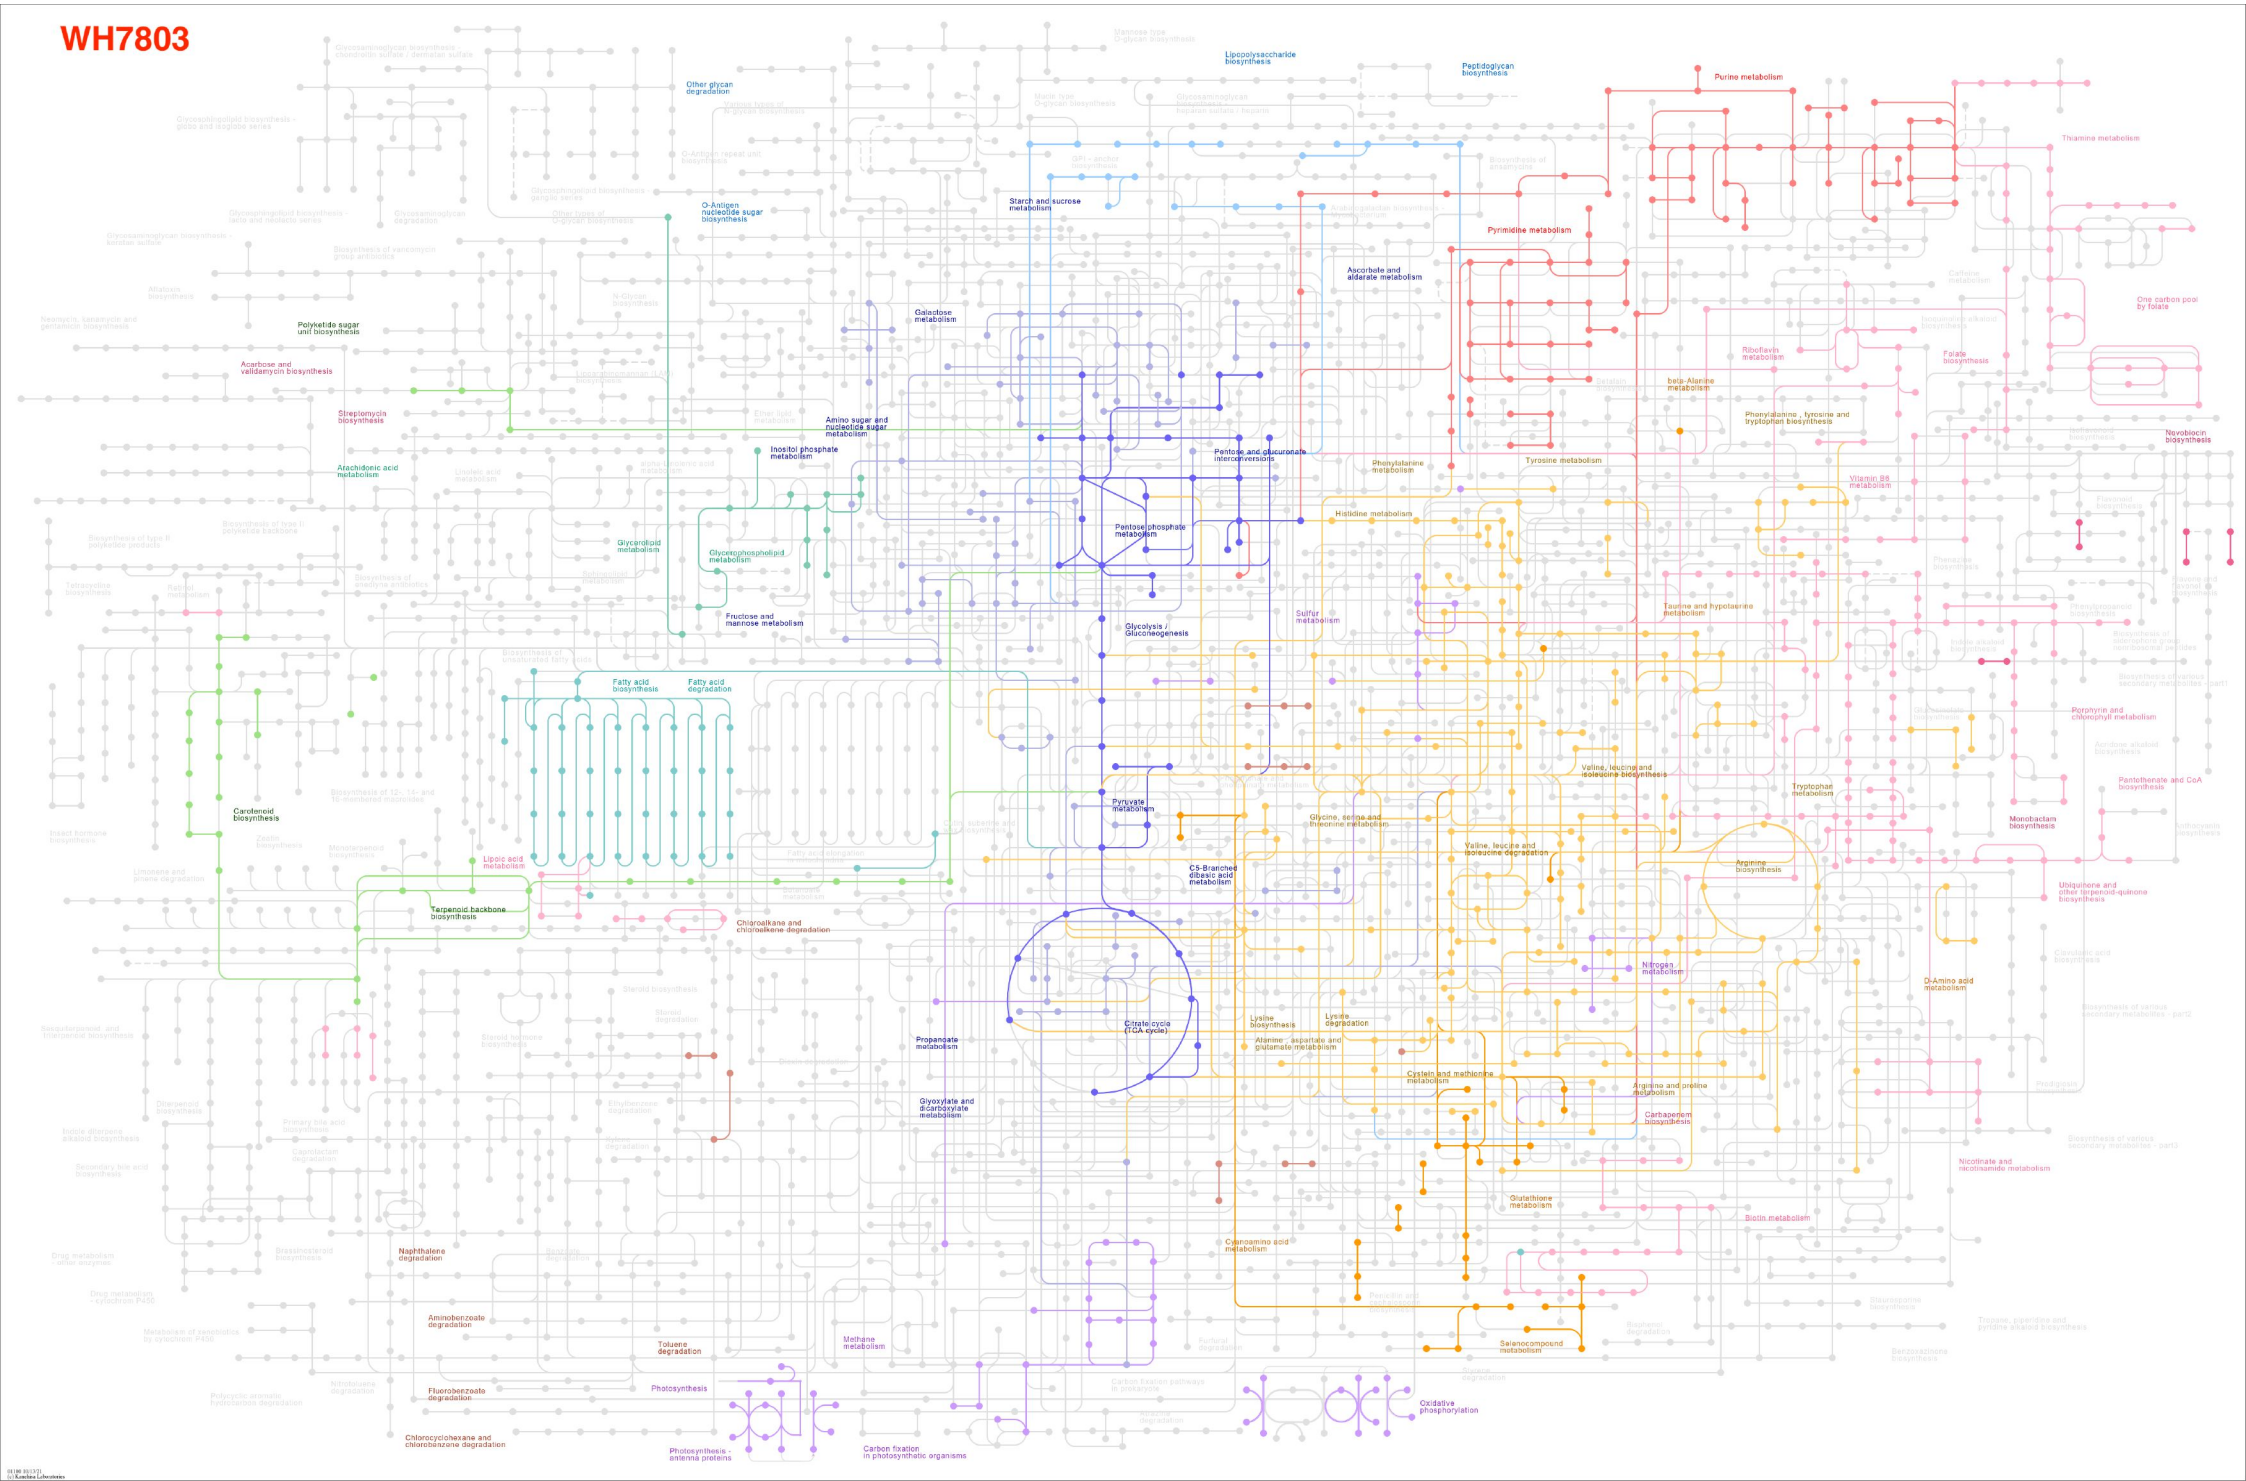

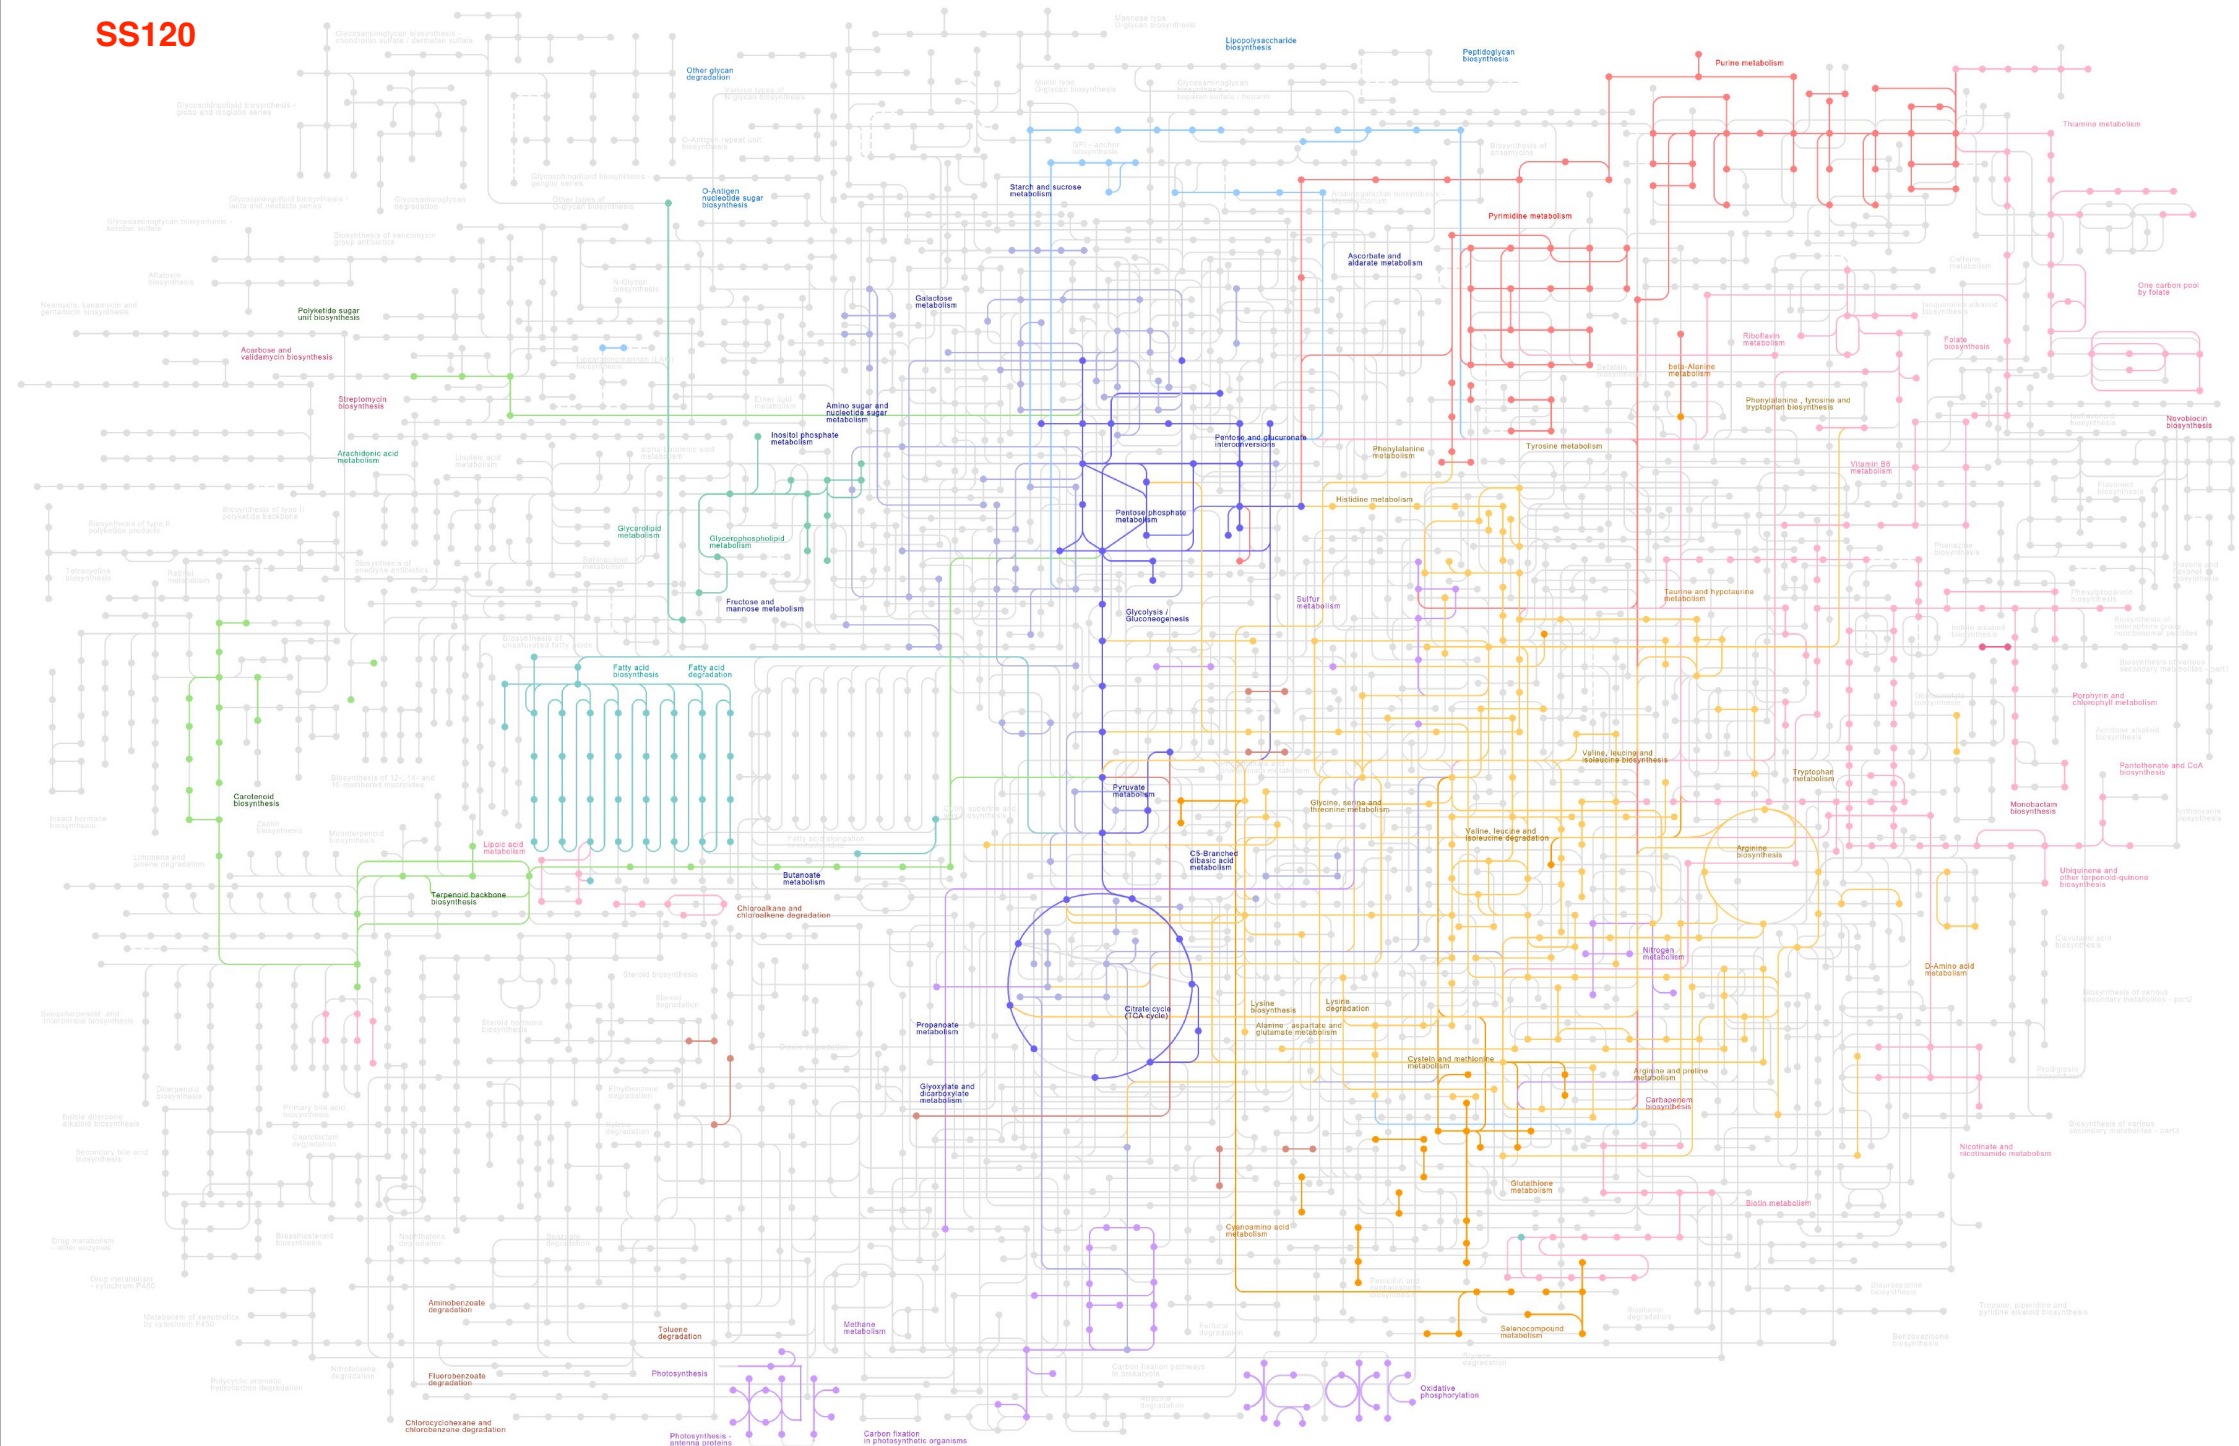

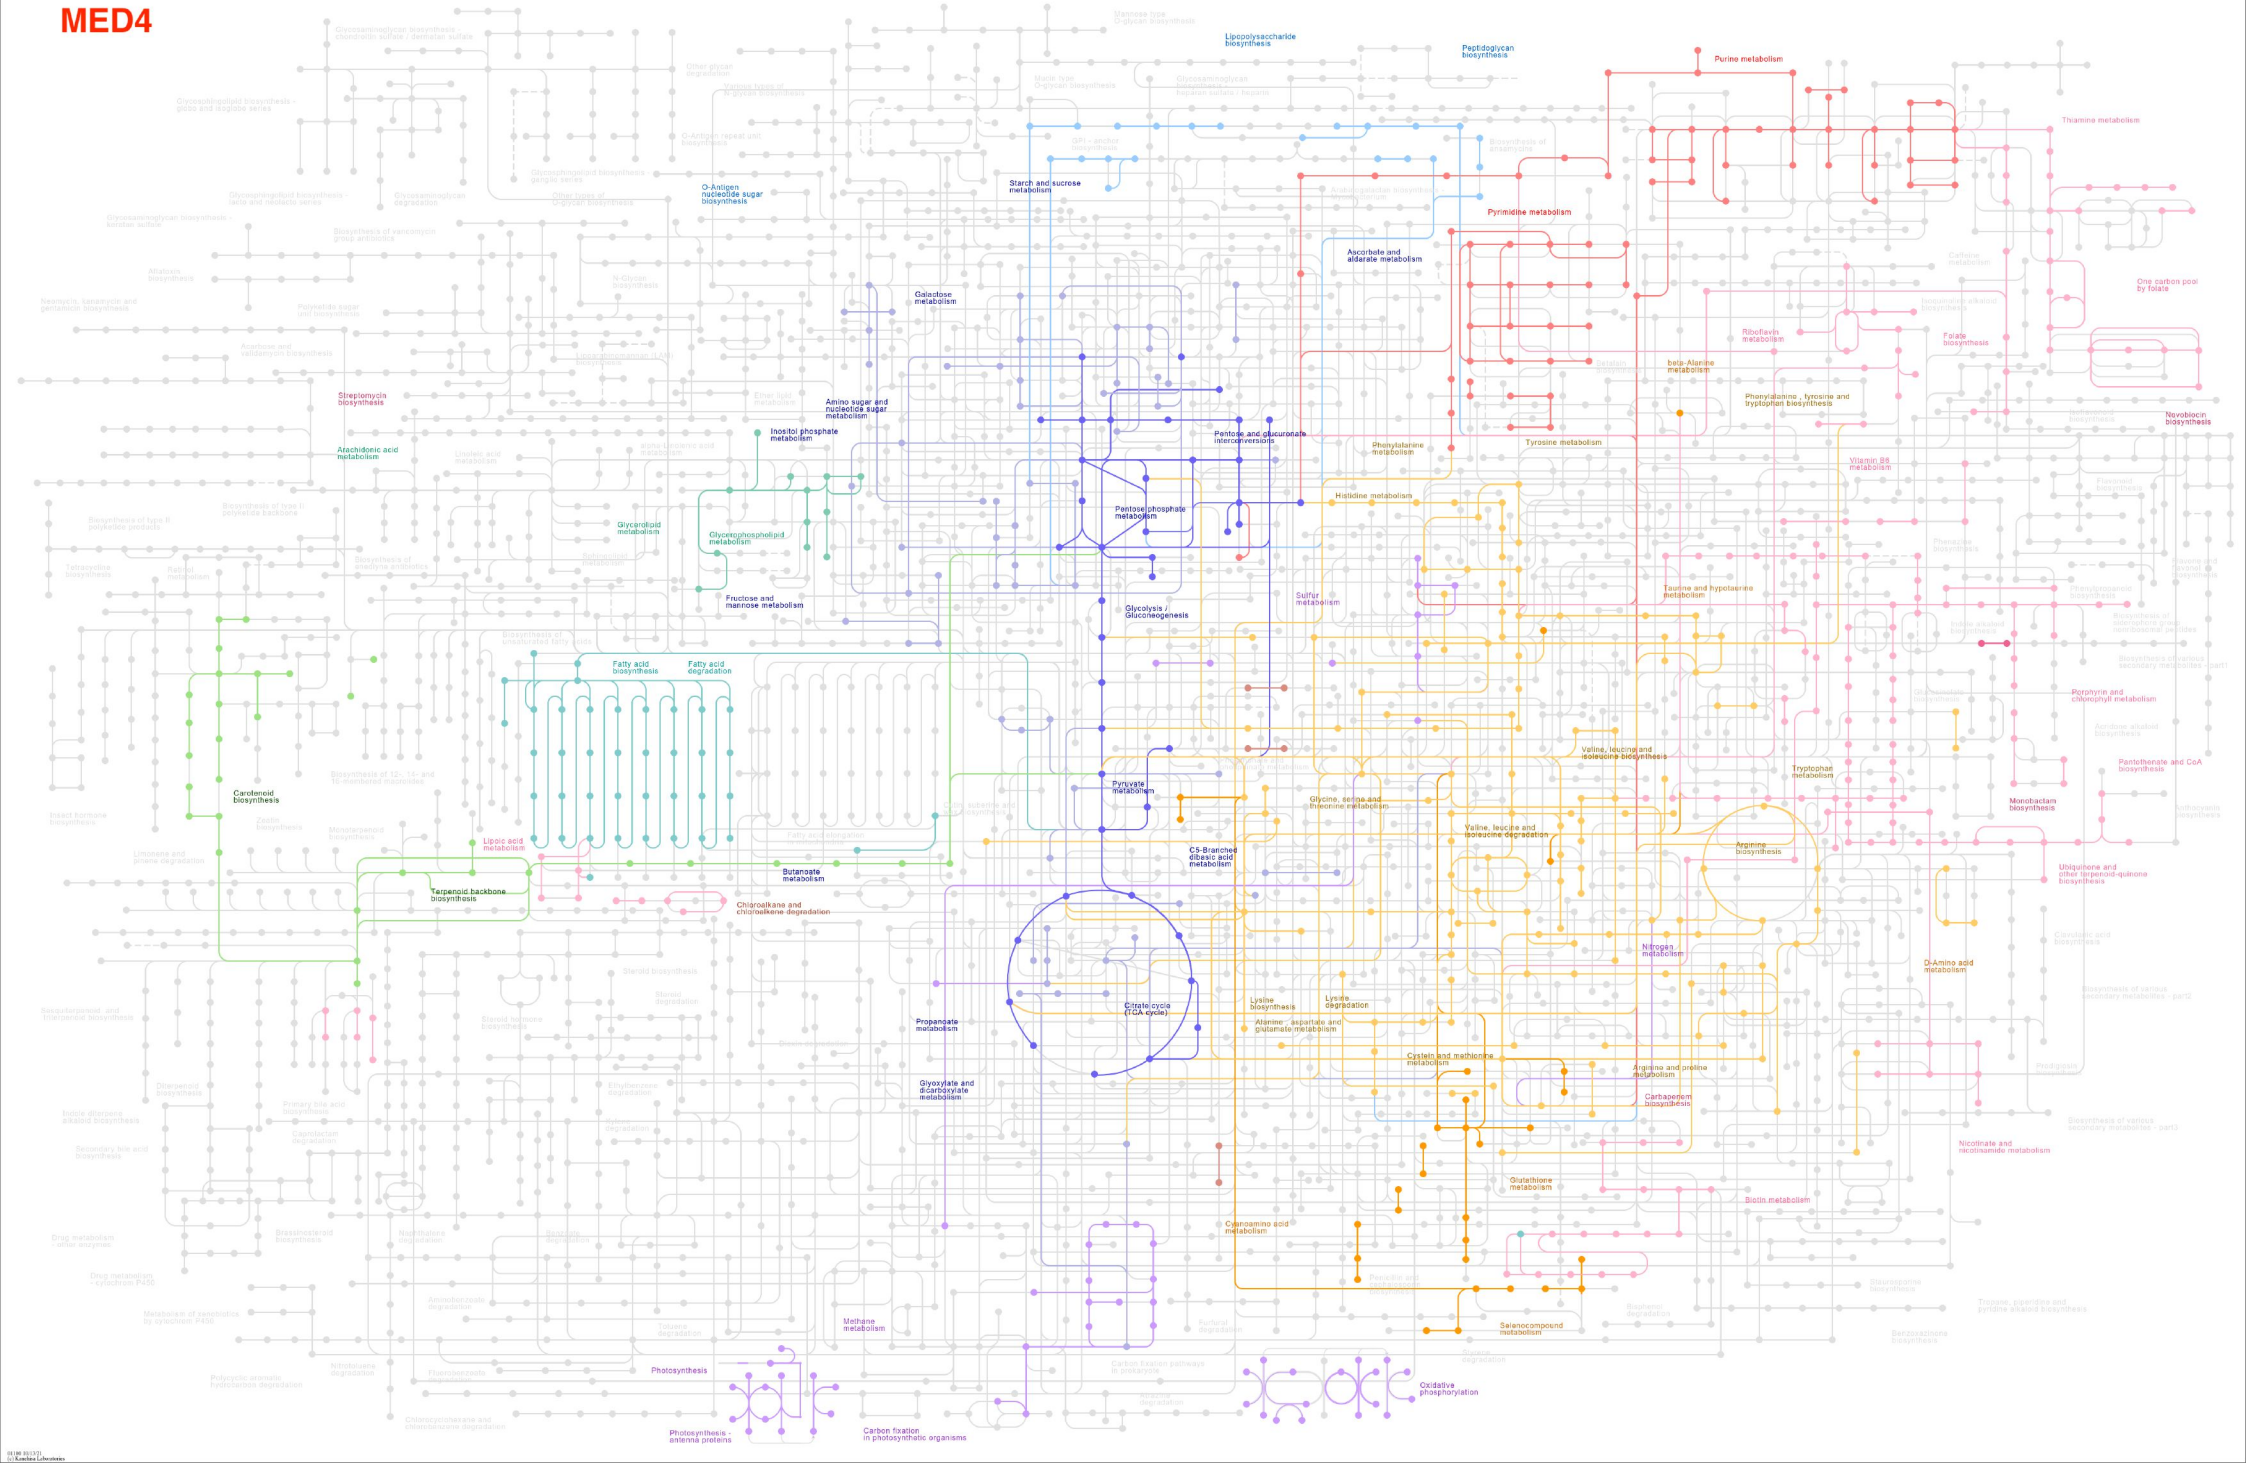

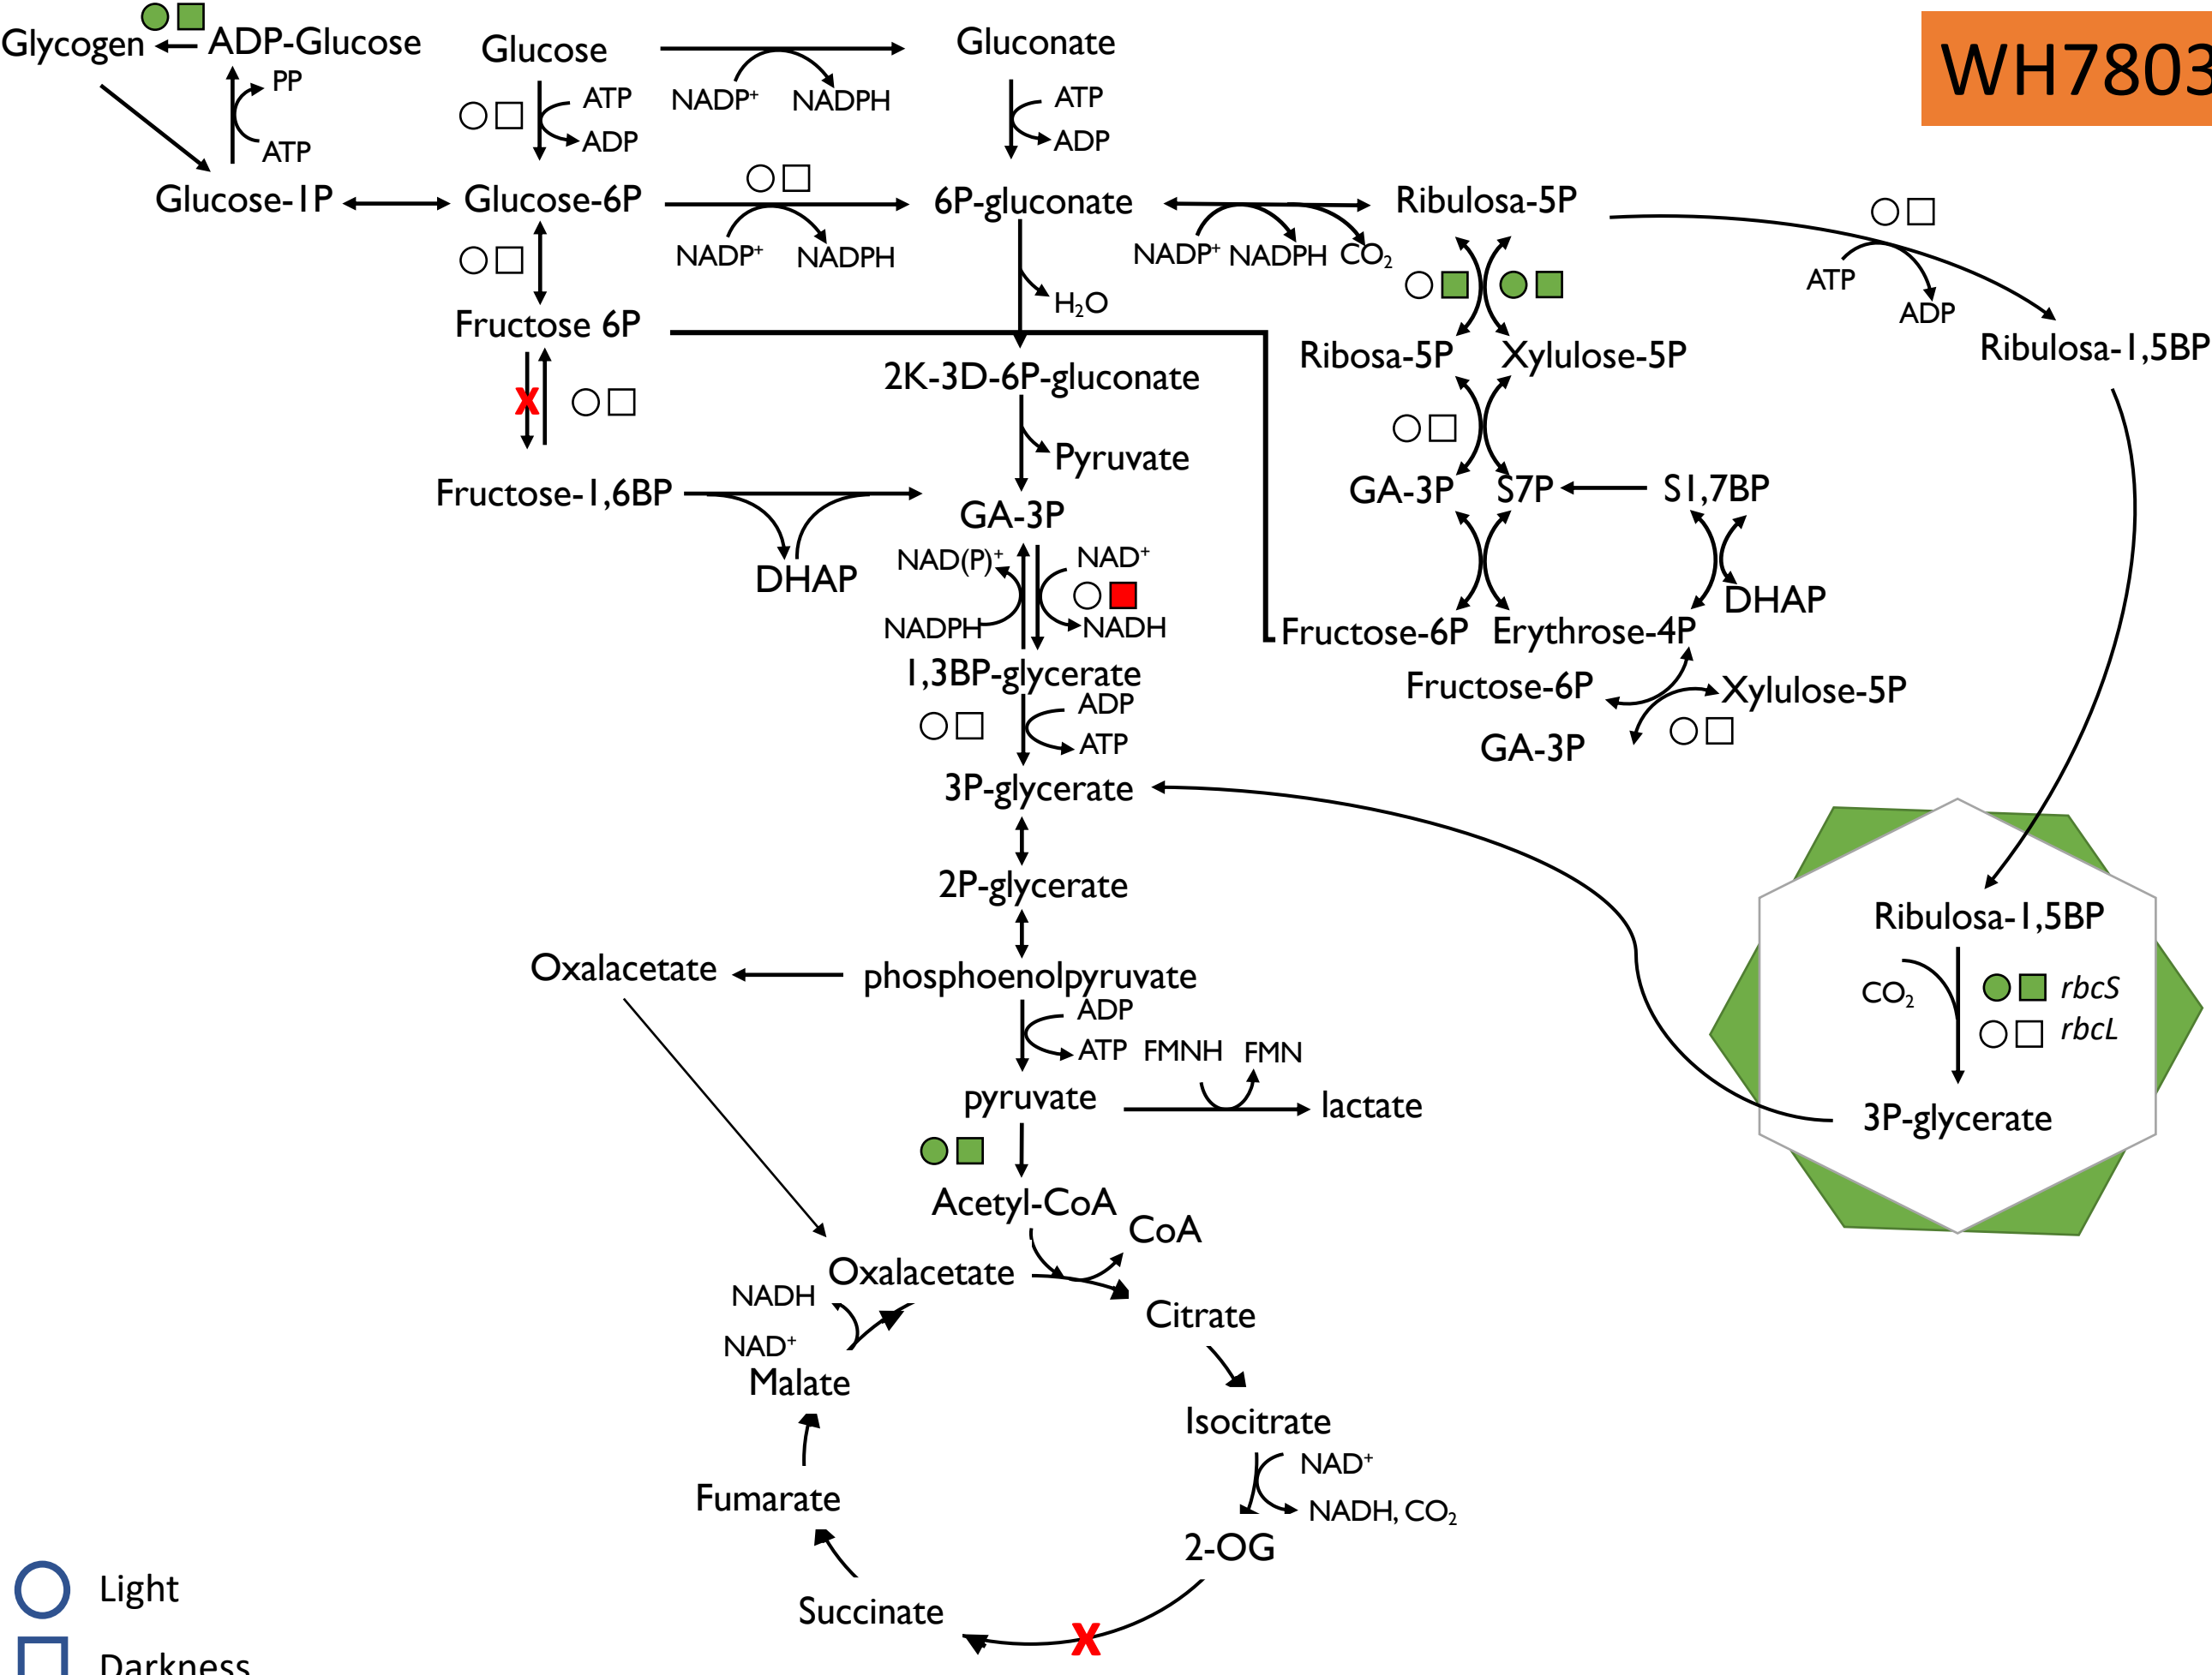

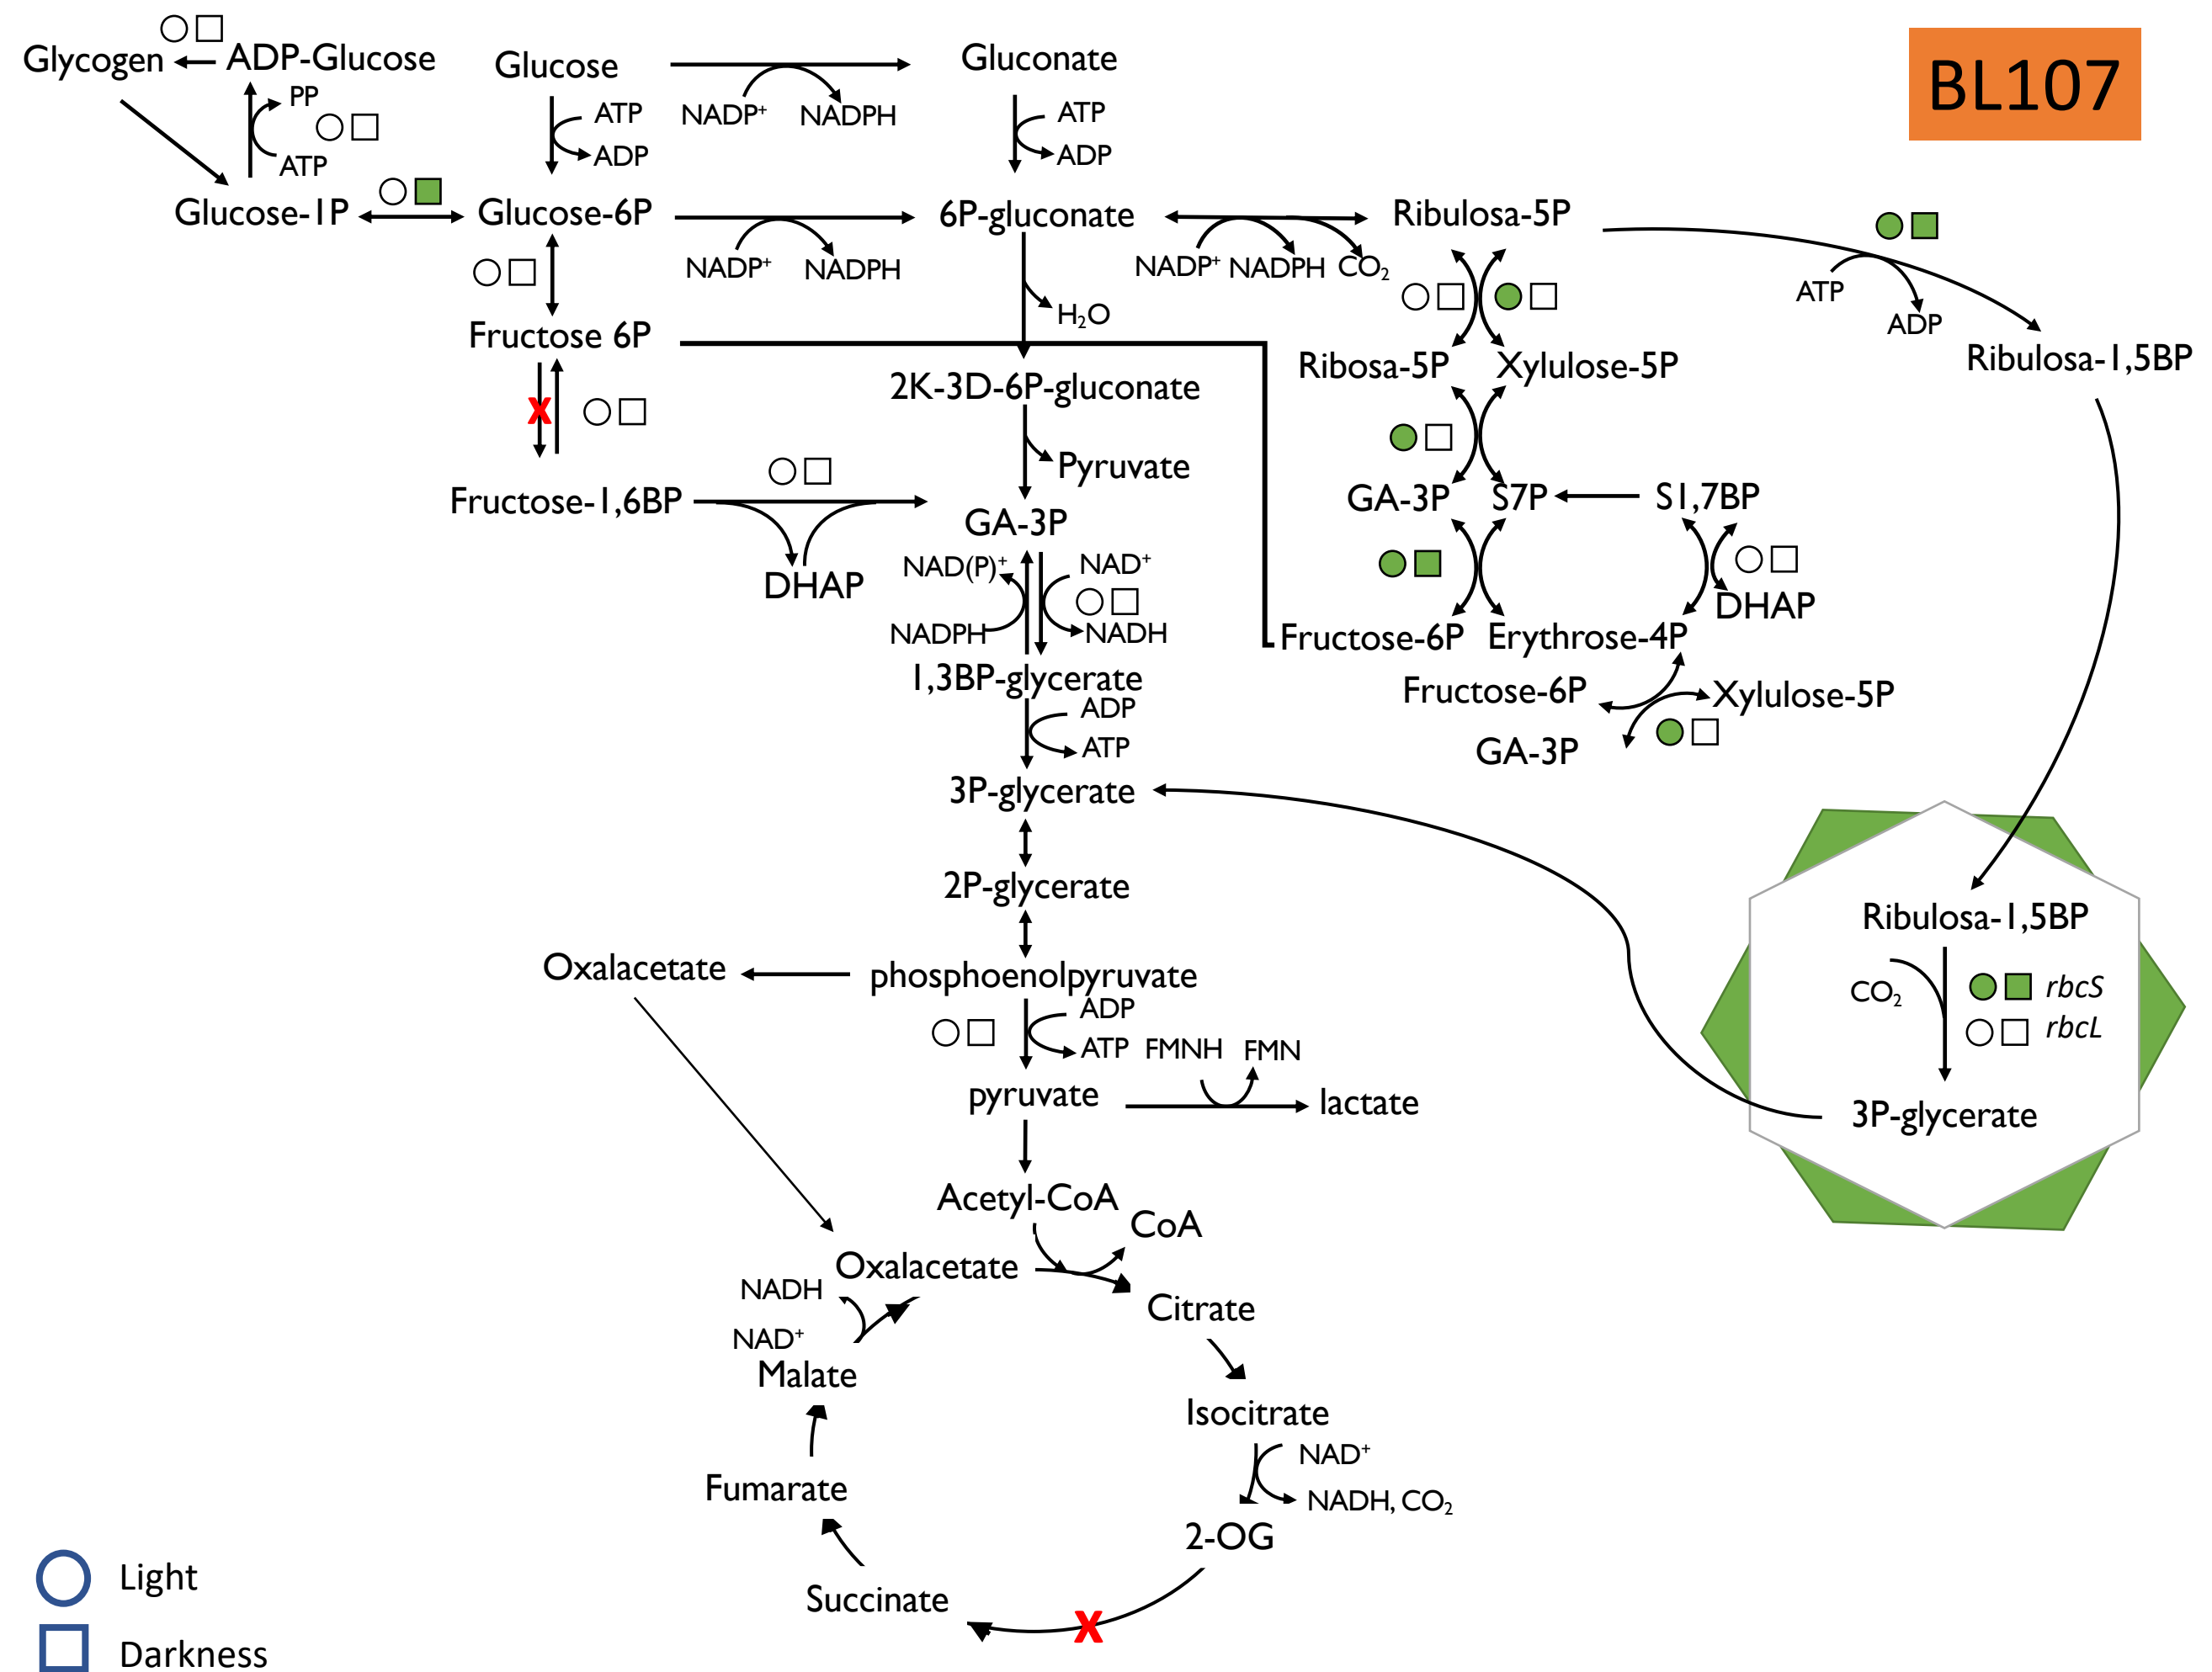

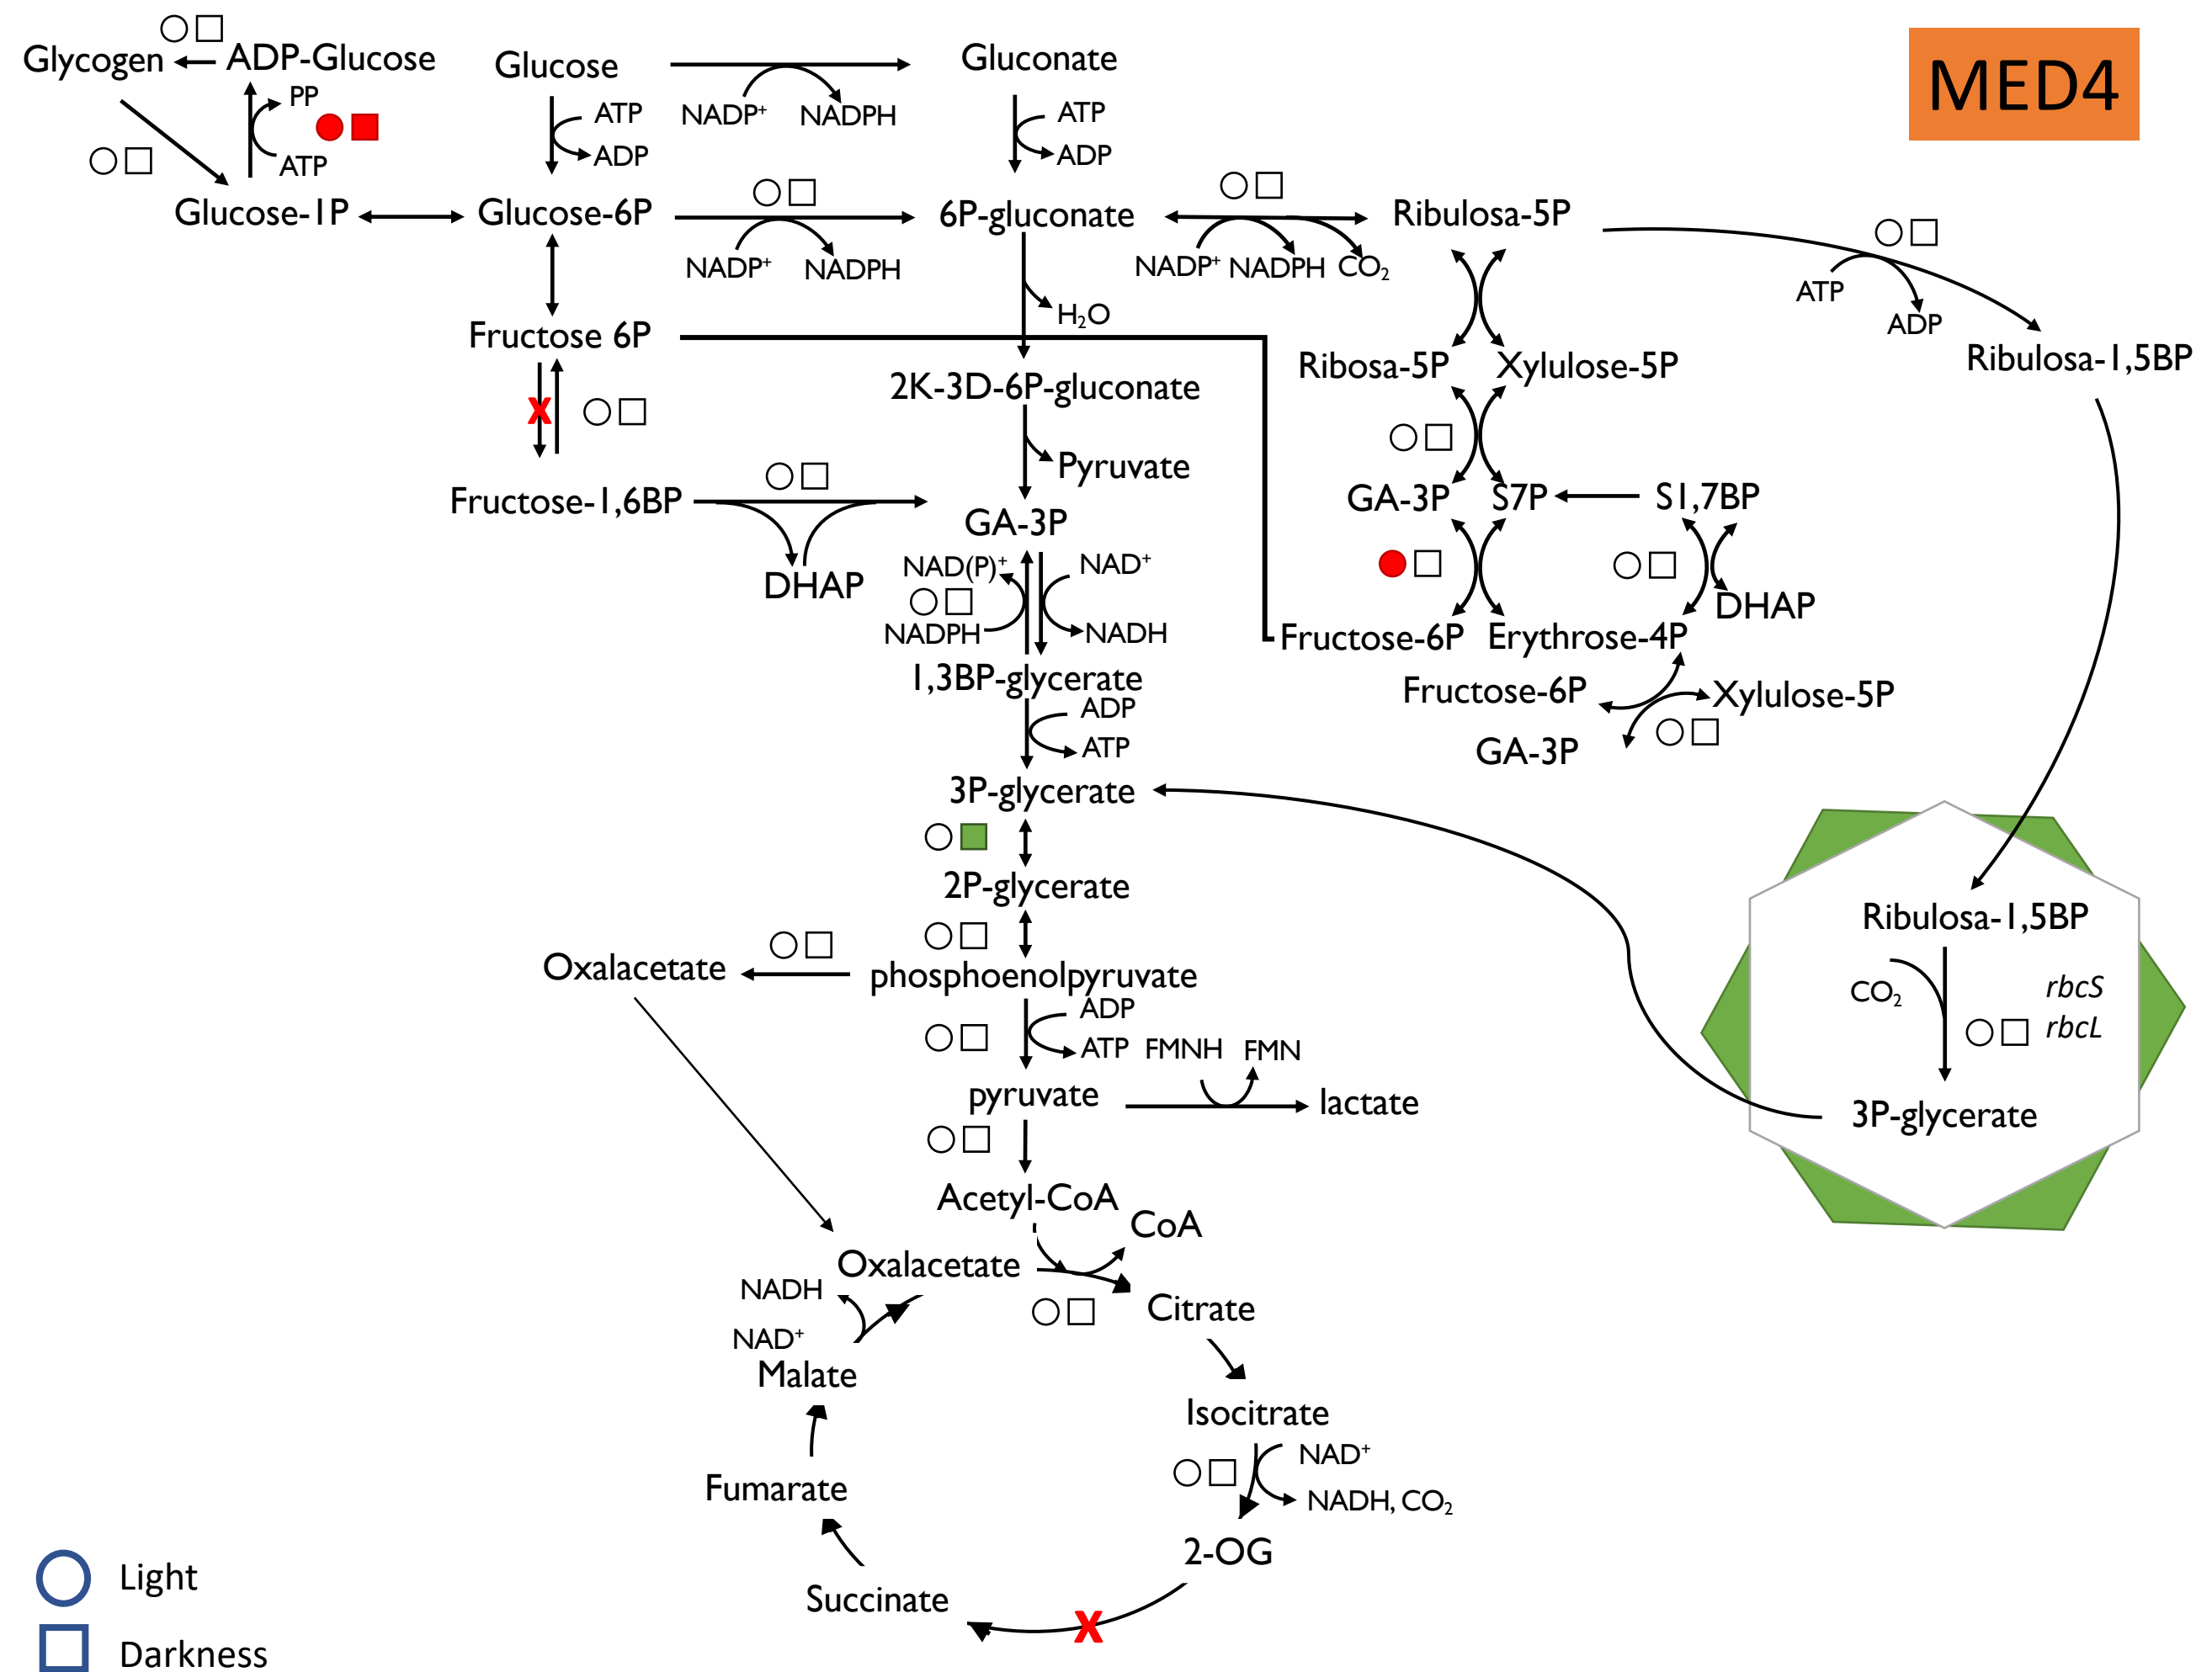

## Legends for supplementary figures

**Supplementary figure 1. Effect of glucose availability on the proportional abundance of genera in cultures from *Synechococcus* and *Prochlorococcus*.** A. *Synechococcus* sp. WH7803 cultures. B. *Synechococcus* sp. BL107 cultures. C. *Prochlorococcus* sp. MED4 cultures. Proportional abundance was calculated based on total protein intensity per genera obtained by relative label-free abundance using MarRef v6 as database. Each column represents individual samples. CL=control light, D=Darkness, GmM= glucose 5 mM, GnM= glucose 100 nM. Three biological replicates were prepared per condition (1,2,3).

**Supplementary figure 2. Global overview map highlighting quantified proteins in *Synechococcus* sp. strains WH8102 and WH7803, and *Prochlorococcus* sp. strain SS120 and MED4.** The pathway map shows all the proteins quantified in the proteomic experiments performed with these cyanobacterial strains. These maps were created in R using the Pathview package (1). KEGG terms were retrieved using the specific tool in UniProt ([www.uniprot.com](http://www.uniprot.com)). The *Synechococcus* sp. strain BL107 map is not shown since its genome has not been included yet in KEGG.

**Supplementary figure 3. Summary of the proteomics results showing the statistically significant changes in enzymes involved in glucose metabolism in *Synechococcus* sp. strains WH8102 and BL107, and *Prochlorococcus* sp. strain under light and darkness.** Circles, light; squares, darkness. Green colour indicates an increase in abundance, and red colour a decrease in abundance. Arrows indicate the metabolic flow upon glucose addition.

## Legends for supplementary tables

**Supplementary table 1.** Compiled quantitation of changes in the proteomes of all studied cyanobacterial strains. Numbers highlighted in light green are statistically significant. TTEST.L.LGnM, Student's t-test of results from cultures in the light vs cultures in the light with 100 nM glucose; FC.L.LGnM, fold-change from control cultures in the light with 100 nM glucose/ cultures in the light ; TTEST.L.LGmM, Student's t-test of results from control cultures in the light vs cultures in the light with 5 mM glucose; FC.L.LGmM, fold-change from control cultures in the light with 5 mM glucose/ cultures in the light ; TTEST.D.DGnM, Student's t-test of results from cultures in darkness vs cultures in darkness with 100 nM glucose; FC.D.DGnM, fold-change results from cultures in darkness with 100 nM glucose/ cultures in darkness ; TTEST.D.DGmM, Student's t-test of results from control cultures in darkness vs cultures in darkness with 5 mM glucose; FC.D.DGmM, fold-change results from cultures in darkness with 5 mM glucose/ cultures in darkness ; TTEST.L.D, Student's t-test of results from cultures in the light vs cultures in darkness; FC.D/L, fold-change results from cultures in darkness / cultures in the light.

**Supplementary table 2. Quantitation of changes in the proteomes of all studied cyanobacterial strains.** Results for each cyanobacterial strain are shown in a separate tab. Abbreviations of column titles are the same as in Supplementary table 1.

**Supplementary table 3. Quantitation of changes in the proteomes of *Alteromonas* from all studied cyanobacterial cultures.** Results from each cyanobacterial culture are

shown in a separate tab. Abbreviations of column titles are the same as in Supplementary table 1.

55 **Supplementary table 4. Quantitation of changes in the proteomes of *Marinobacter* from all studied cyanobacterial cultures.** Results from each cyanobacterial culture are shown in a separate tab. Abbreviations of column titles are the same as in Supplementary table 1.

1. Luo W, Brouwer C. 2013. Pathview: an R/Bioconductor package for pathway-based data integration and visualization. *Bioinformatics* 29:1830-1.
